# Supplementary material for: Deciphering the Crucial Roles of the Quorum-Sensing Transcription Factor SdiA in NADPH Metabolism and (S)-Equol Production in Escherichia coli Nissle 1917
Source: MDPI journal article supplement (doi:10.3390/antiox13030259), 2024-02-20
Supplement: s1 [file s1]

# Deciphering the Crucial Roles of the Quorum-Sensing Transcription Factor SdiA in NADPH Metabolism and (S)-Equol Production in *Escherichia coli* Nissle 1917

Zhe Wang <sup>1,2</sup>, Yiqiang Dai <sup>1,2</sup>, Fidelis Azi <sup>3</sup>, Mingsheng Dong <sup>1,\*</sup> and Xiudong Xia <sup>1,2,4,5,\*</sup>

<sup>1</sup> College of Food Science and Technology, Nanjing Agricultural University, Nanjing 210095, China; wangzhe@stu.njau.edu.cn (Z.W.); 2021208005@stu.njau.edu.cn (Y.D.)

<sup>2</sup> Institute of Agro-Product Processing, Jiangsu Academy of Agricultural Sciences, Nanjing 210014, China

<sup>3</sup> Department of Chemical Engineering, Guangdong Technion-Israel Institute of Technology, Shantou 515063, China; fidelis.azi@gtit.edu.cn

<sup>4</sup> Jiangsu Key Laboratory for Food Quality and Safety-State Key Laboratory Cultivation Base, Ministry of Science and Technology, Nanjing 210014, China

<sup>5</sup> School of Food and Biological Engineering, Jiangsu University, Zhenjiang 212013, China

\* Correspondence: dongms@njau.edu.cn (M.D.); 20140034@jaas.ac.cn (X.X.)

## Supplementary Tables

**Table S1.** Nucleotide sequences of primers. Primer sequence utilized for homologous recombination is underlined.

| Oligonucleotides  | Sequences, 5'-3'                                        |
|-------------------|---------------------------------------------------------|
| Pf_Pnar           | GAAGGAGATATACATATGGCAGATCTCAATTGG                       |
| Pr_Pnar           | ATGTATATCTCCTTCTTAAAGTTAAACAAATCTTTAAGGGCATTATACCG<br>C |
| Pf_malEK (up)     | GCGGTCAGCATAATCATTACCC                                  |
| Pr_malEK (up)     | GGC <u>GTCGACCCTAGGG</u> GAGACTGCTGCCGAAAGAGTCT         |
| Pf_malEK (down)   | <u>CCTAGGGTCGAC</u> GCCCCCTGCTGTTCAAAACGTTTTG           |
| Pr_malEK (down)   | TCCGGTTACGGTAGGCAAC                                     |
| Pf_exo/cea (up)   | GCTCCCATATCCCAGAACTG                                    |
| Pr_exo/cea (up)   | <u>GTCGACCCTAGGG</u> GCGGTCAGATTGAGTTCACCG              |
| Pf_exo/cea (down) | ACCC <u>CCTAGGGTCGAC</u> CGGCATGGTCCCGGAAAACGGTA        |
| Pr_exo/cea (down) | CCGCAATCATTTACGTTATCC                                   |
| Pf_bglF           | ATGGAAACGGAGTTAGCCAGAAAAAT                              |
| Pr_bglF           | TTAGCGAATGATGGATAACAGCG                                 |
| Pf_bglB           | ATGAAAGCATTTCCAGAAACATTCTT                              |
| Pr_bglB           | TTAAGGTGCTTTAATGGTTATTTTTTTTAATGACAG                    |
| Pf_ptsG (up)      | CGTTATGTCCCCCTGGATC                                     |
| Pr_ptsG (up)      | CCTGAGTATGGGTGCTTTTT                                    |

---

|                       |                                          |
|-----------------------|------------------------------------------|
| Pf_ptsG (down)        | GAGTATGGGTGCTTTTTTGGCAGAAGCAGGCGGT       |
| Pr_ptsG (down)        | CTACCGGGTTCTGGTAAGC                      |
| Pf_decR (up)          | ATCCACCAGCGTCAGCAC                       |
| Pr_decR (up)          | CTTCCAGCTTCGCGATGGA                      |
| Pf_decR (down)        | TCGCGAAGCTGGAAGTCATGTCGGCAACCTGGAC       |
| Pr_decR (down)        | ATGTTAGATAAAATTGACCGTAAGC                |
| Pf_HW372_01960 (up)   | GGCTCCCCTGTGAAATCGT                      |
| Pr_HW372_01960 (up)   | GGTTGATCGCGTCTTTAATATCG                  |
| Pf_HW372_01960 (down) | AAGACGCGATCAACCGTGATTTCAGGGGCAAGAT       |
| Pr_HW372_01960 (down) | GCGGAAGTTGCGAGTAAAGC                     |
| Pf_yhjC (up)          | TGACCGATTGTTGTTTACAACG                   |
| Pr_yhjC (up)          | CTCCACCTGAATACGTAAAAAGAC                 |
| Pf_yhjC (down)        | ACCCAGGTGCGGTGTATAAC                     |
| Pr_yhjC (down)        | ACTGGCTAACAACAAGAAGTGTTTCGCGCCAGATAC     |
| Pf_HW372_03545 (up)   | CGCAAGCTGGCAGAACTT                       |
| Pr_HW372_03545 (up)   | ATTTATCTCCGGTAGAGGTCGC                   |
| Pf_HW372_03545 (down) | CTACCGGAAGATAAATGCTACATTAATGAGCATCGTGAAG |
| Pr_HW372_03545 (down) | GCGCCATCATGATCAGAACATC                   |
| Pf_sdiA (up)          | ACGTCGTTTGTCTGGCGG                       |
| Pr_sdiA (up)          | ATAGTAAACCGCAACGCCCC                     |
| Pf_sdiA (down)        | GTTGCGGTTTACTATGCAGCTGGAGTACGATTACTATTCG |

---

---

|                      |                                               |
|----------------------|-----------------------------------------------|
| Pr_sdiA (down)       | GCTGATGTCTTACCTTCCGCC                         |
| Pf_yhaJ (up)         | ACAACATAATCAGGTCGCGTC                         |
| Pr_yhaJ (up)         | CACATTCGTTTGCAAAGGAAGG                        |
| Pf_yhaJ (down)       | TGAGAACGAAATGGCCTTCCGCACTTAGCTACACC           |
| Pr_yhaJ (down)       | CCACGATATTTACGCGCG                            |
| Pf_addsgRNA          | GTTCCGTTTATCCGGGCAAACTAGTATTATACCTAGGACTGAGC  |
| Pr_maleK-sgRNA       | TCTGCTCGACAAACCCTTCGTTTTAGAGCTAGAAATAGCAAGTT  |
| Pr_exo/cea-sgRNA     | ACTCCATACCCTCCCCAACGTTTTAGAGCTAGAAATAGCAAGT   |
| Pr_HW372_01960-sgRNA | TGTGTTTGGAGATGTTTCAGGTTTTAGAGCTAGAAATAGCAAGT  |
| Pr_yhjC-sgRNA        | GCAGTTGTTTCATCAAAGTCGTTTTAGAGCTAGAAATAGCAAGT  |
| Pr_HW372_03545-sgRNA | GCGCGAGTCAGTTAACGCCTTTTTAGAGCTAGAAATAGCAAGT   |
| Pr_sdiA-sgRNA        | TTCATGGTAGACCTCTTCTGTTTTAGAGCTAGAAATAGCAAGT   |
| Pr_yhaJ -sgRNA       | ATGGATGCGATCGATCGCCGTTTTAGAGCTAGAAATAGCAAGT   |
| Pr_ptsG-sgRNA        | GTATCCGTA CTGCCTATCGAGTTTTAGAGCTAGAAATAGCAAGT |
| Pr_decR -sgRNA       | GTCTGGTAAACAGTGTACCGTTTTAGAGCTAGAAATAGCAAGT   |
| F_16S (qPCR)         | GTTAAGTCCCGCAACGAGCGCAA                       |
| R_q16S (qPCR)        | CTTTATGAGGTCCGCTTGCTCTC                       |
| F_zwf (qPCR)         | CCAAGCTGGATCTGAGCTATTC                        |
| R_zwf (qPCR)         | CCACTTCATCACGACGTACAA                         |
| F_gnd (qPCR)         | GAACCGCTGTCGCTGATTA                           |
| R_gnd (qPCR)         | GGGCCAGAGAGAACTTTAGATG                        |

---

**Table S2.** Vectors used in this study.

| Vectors                                                                                                 | Relevant properties                                                                                                                                    | Reference      |
|---------------------------------------------------------------------------------------------------------|--------------------------------------------------------------------------------------------------------------------------------------------------------|----------------|
| pETM6                                                                                                   | pBR322 ori, AmpR, T7 promote                                                                                                                           | Addgene #49795 |
| pEcCas                                                                                                  | <i>Cas9</i> under <i>cas</i> promoter, gRNA- <i>pMB1</i> under <i>rha</i> promoter, $\lambda$ -red under <i>araB</i> promoter, pSC101 ori, <i>KanR</i> | Addgene #73227 |
| pEcgRNA                                                                                                 | sgRNA under J23119 promoter, pMB1 ori, <i>aadA</i>                                                                                                     | Addgene#166581 |
| pETM6- <i>P<sub>nar</sub></i>                                                                           | pBR322 ori, AmpR, <i>nar</i> promote                                                                                                                   | This study     |
| pUC57- <i>malEK</i>                                                                                     | <i>malEK</i> homology arms, pBR322 ori                                                                                                                 | This study.    |
| pUC57- <i>exo/cea</i>                                                                                   | <i>exo/cea</i> homology arms, pBR322 ori                                                                                                               | This study.    |
| pUC57- <i>ptsG</i>                                                                                      | <i>ptsG</i> homology arms, pBR322 ori                                                                                                                  | This study.    |
| pUC57- <i>yhaJ</i>                                                                                      | <i>yhaJ</i> homology arms, pBR322 ori                                                                                                                  | This study.    |
| pUC57- <i>decR</i>                                                                                      | <i>decR</i> homology arms, pBR322 ori                                                                                                                  | This study     |
| pUC57- <i>HW372_01960</i>                                                                               | <i>HW372_01960</i> homology arms, pBR322 ori                                                                                                           | This study.    |
| pUC57- <i>yhjC</i>                                                                                      | <i>yhjC</i> homology arms, pBR322 ori                                                                                                                  | This study.    |
| pUC57- <i>HW372_03545</i>                                                                               | <i>HW372_03545</i> homology arms, pBR322 ori                                                                                                           | This study.    |
| pUC57- <i>sdiA</i>                                                                                      | <i>sdiA</i> homology arms, pBR322 ori                                                                                                                  | This study.    |
| pUC57- <i>exo/cea-P<sub>nar</sub>-bglIF-P<sub>nar</sub>-bglB</i>                                        | pUC57- <i>exo/cea</i> carrying - <i>P<sub>nar</sub>-bglIF-P<sub>nar</sub>-bglB</i>                                                                     | This study.    |
| pUC57- <i>malEK-P<sub>nar</sub>-dznr-P<sub>nar</sub>-ddrc-P<sub>nar</sub>-dhdr-P<sub>nar</sub>-thdr</i> | pUC57- <i>malEK</i> carrying <i>P<sub>nar</sub>-dznr-P<sub>nar</sub>-ddrc-P<sub>nar</sub>-dhdr-P<sub>nar</sub>-thdr</i>                                | This study.    |
| pEcgRNA- <i>ptsG</i>                                                                                    | Derived from pEcgRNA, target <i>ptsG</i> in EcN                                                                                                        | This study.    |
| pEcgRNA- <i>malEK</i>                                                                                   | Derived from pEcgRNA, target <i>malEK</i> in EcN                                                                                                       | This study.    |
| pEcgRNA- <i>exo/cea</i>                                                                                 | Derived from pEcgRNA, target <i>exo/cea</i> in EcN                                                                                                     | This study.    |
| pEcgRNA- <i>yhaJ</i>                                                                                    | Derived from pEcgRNA, target <i>yhaJ</i> in EcN                                                                                                        | This study.    |
| pEcgRNA- <i>decR</i>                                                                                    | Derived from pEcgRNA, target <i>decR</i> in EcN                                                                                                        | This study.    |
| pEcgRNA- <i>HW372_01960</i>                                                                             | Derived from pEcgRNA, target <i>HW372_01960</i> in EcN                                                                                                 | This study.    |
| pEcgRNA- <i>yhjC</i>                                                                                    | Derived from pEcgRNA, target <i>yhjC</i> in EcN                                                                                                        | This study.    |
| pEcgRNA- <i>HW372_03545</i>                                                                             | Derived from pEcgRNA, target <i>HW372_03545</i> in EcN                                                                                                 | This study.    |
| pEcgRNA- <i>sdiA</i>                                                                                    | Derived from pEcgRNA, target <i>sdiA</i> in EcN                                                                                                        | This study.    |
| pETM6- <i>P<sub>nar</sub>-yhaJ</i>                                                                      | pETM6- <i>P<sub>nar</sub></i> harboring <i>yhaJ</i>                                                                                                    | This study.    |
| pETM6- <i>P<sub>nar</sub>-decR</i>                                                                      | pETM6- <i>P<sub>nar</sub></i> harboring <i>decR</i>                                                                                                    | This study.    |
| pETM6- <i>P<sub>nar</sub>-HW372_01960</i>                                                               | pETM6- <i>P<sub>nar</sub></i> harboring <i>HW372_01960</i>                                                                                             | This study.    |
| pETM6- <i>P<sub>nar</sub>-yhjC</i>                                                                      | pETM6- <i>P<sub>nar</sub></i> harboring <i>yhjC</i>                                                                                                    | This study.    |
| pETM6- <i>P<sub>nar</sub>-HW372_03545</i>                                                               | pETM6- <i>P<sub>nar</sub></i> harboring <i>HW372_03545</i>                                                                                             | This study.    |
| pETM6- <i>P<sub>nar</sub>-sdiA</i>                                                                      | pETM6- <i>P<sub>nar</sub></i> harboring <i>sdiA</i>                                                                                                    | This study.    |

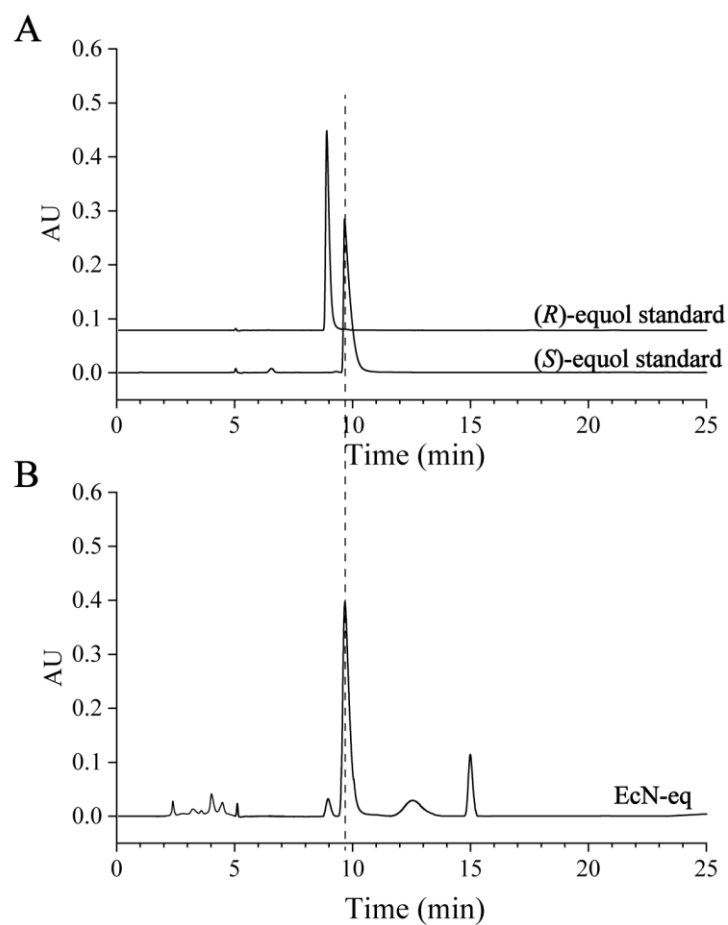

**Fig. S1.** Chiral HPLC analysis of daidzin metabolites converted by strain EcN-eq. (A). Reference standards of (*S*)-Equol and (*R*)-Equol. (B). HPLC spectrum displaying the reaction sample from strain EcN-eq.

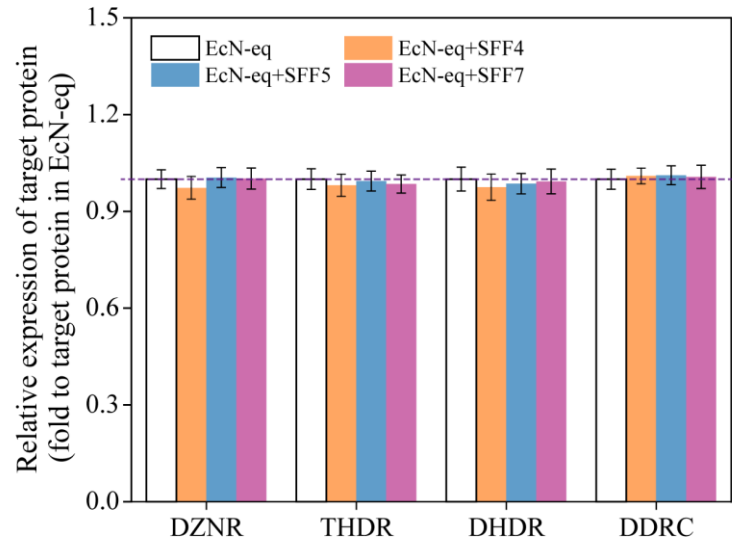

**Fig. S2.** Densitometric semi-quantifications of the SDS-PAGE in Fig. 2C. Experiments in this study were conducted in triplicate, and error bars signify standard deviation (SD) with a 95% confidence interval (CI).

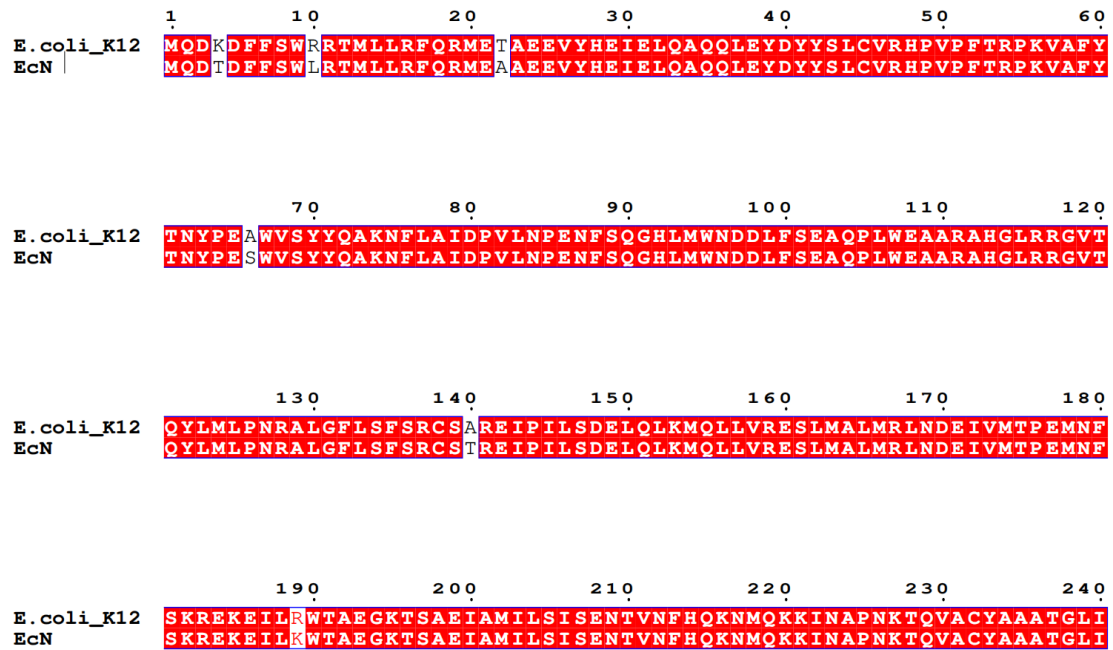

**Fig. S3.** Sequence alignment of *E. coli* K12\_SdiA and *EcN*\_SdiA. The red background box indicates identical sequence and red letters indicate diverse sequence.
